# Supplementary material for: Evaluation of the Effect of Auxiliary Starter Yeasts With Enzyme Activities on Kazak Cheese Quality and Flavor
Source: PubMed Central journal article supplement (PMC7772356; doi:10.3389/fmicb.2020.614208), 2020-12-16
Supplement: Data_Sheet_1.pdf [file Data_Sheet_1.pdf]

## *Supplementary Material*

### **CATALOGUE**

|                                                                                                   |   |
|---------------------------------------------------------------------------------------------------|---|
| Supplementary tables.....                                                                         | 2 |
| Table S1. DNA sequence result of yeasts in Kazakh cheese.....                                     | 2 |
| Table S2. Enzymatic activity of yeasts (U/mL). .....                                              | 3 |
| Table S3. Free amino acid content of four Kazakh cheeses (g/100 g).....                           | 4 |
| Table S4. Organic acid content of four Kazakh cheeses (g/kg) .....                                | 5 |
| Table S5. Texture analysis of cheeses .....                                                       | 5 |
| Table S6. Odor description and odor activity value (OAV) of aroma compounds in Kazakh cheese..... | 6 |
| Supplementary figures.....                                                                        | 7 |
| Figure S1A. Protease hydrolysis diagram of yeasts.....                                            | 7 |
| Figure S1B. Lipase hydrolysis diagram of yeasts.....                                              | 8 |
| Figure S1C. $\beta$ -galactosidase hydrolysis diagram of yeasts .....                             | 8 |
| Figure S2. PCA analysis of volatile compounds in four Kazakh cheese. ....                         | 9 |
| Figure S3. Volatile flavor map of four cheeses .....                                              | 9 |

## Supplementary tables

**Table S1.** DNA sequence result of yeasts in Kazakh cheese

| Strain | Size (bp) | Identification                                | Similarity (%) | Accession number |
|--------|-----------|-----------------------------------------------|----------------|------------------|
| A1     | 568       | <i>Kluyveromyces lactis</i> strain GG799      | 99.30          | CP021245.1       |
| A2     | 697       | <i>Kluyveromyces marxianus</i> strain P2      | 99.85          | KF851351.1       |
| A3     | 569       | <i>Kluyveromyces lactis</i> strain CBS 2105   | 100            | CP042459.1       |
| A4     | 627       | <i>Kluyveromyces marxianus</i> strain TY17    | 99.66          | FJ972218.1       |
| A5     | 773       | <i>Torulaspora debrueckii</i> strain BZL-163  | 99.48          | MN371902.1       |
| A6     | 646       | <i>Kluyveromyces lactis</i> strain GG799      | 99.69          | CP021245.1       |
| A7     | 528       | <i>Lodderomyces elongisporus</i> strain NX-15 | 99.24          | MN371867.1       |
| A8     | 544       | <i>Pichia kudriavzevii</i> strain PK1         | 99.09          | MN648834.1       |
| A9     | 582       | <i>Pichia kudriavzevii</i> strain Z2          | 100            | MK310151.1       |
| A10    | 504       | <i>Candida parapsilosis</i> strain SLDY-016   | 99.60          | MH748620.1       |
| A11    | 480       | <i>Pichia kudriavzevii</i> strain SLDY-035    | 99.38          | MH752055.1       |
| A12    | 579       | <i>Kluyveromyces marxianus</i> strain T1      | 99.31          | JX141370.1       |
| A13    | 561       | <i>Clavispora lusitaniae</i> strain PC5       | 99.64          | EF063132.1       |
| A14    | 590       | <i>Lodderomyces elongisporus</i> strain WY6   | 99.49          | EF643601.1       |
| A15    | 516       | <i>Candida parapsilosis</i> strain SLDY-277   | 99.61          | MH782053.1       |
| A16    | 409       | <i>Pichia fermentans</i> strain Y1-4          | 99.03          | KF646172.1       |
| A17    | 549       | <i>Clavispora lusitaniae</i> strain TY11      | 99.45          | FJ972214.1       |
| A18    | 504       | <i>Pichia fermentans</i> strain NRRL Y-1619   | 99.21          | EF552458.1       |
| A19    | 461       | <i>Pichia fermentans</i> strain DF-2          | 100            | KJ638687.1       |

**Table S2.** Enzymatic activity of yeasts (U/mL).

| Identification                   | Number | Protease activity | Lipase activity | $\beta$ -galactosidase activity |
|----------------------------------|--------|-------------------|-----------------|---------------------------------|
| <i>Kluyveromyces marxianus</i>   | A2     | 135 $\pm$ 17      | 203 $\pm$ 19    | 217 $\pm$ 23                    |
| <i>Pichia kudriavzevii</i>       | A11    | 103 $\pm$ 10      | nd              | 375 $\pm$ 26                    |
| <i>Pichia fermentans</i>         | A19    | 111 $\pm$ 12      | 227 $\pm$ 23    | 334 $\pm$ 32                    |
| <i>Clavispora lusitaniae</i>     | A13    | 86 $\pm$ 9        | 187 $\pm$ 18    | nd                              |
| <i>Lodderomyces elongisporus</i> | A14    | 94 $\pm$ 7        | nd              | 254 $\pm$ 20                    |
| <i>Candida parapsilosis</i>      | A10    | 121 $\pm$ 11      | nd              | nd                              |
| <i>Kluyveromyces marxianus</i>   | A4     | 105 $\pm$ 15      | 147 $\pm$ 15    | nd                              |
| <i>Pichia fermentans</i>         | A16    | 91 $\pm$ 17       | 104 $\pm$ 10    | nd                              |
| <i>Kluyveromyces lactis</i>      | A1     | 82 $\pm$ 14       | nd              | nd                              |
| <i>Kluyveromyces marxianus</i>   | A12    | 113 $\pm$ 19      | nd              | 243 $\pm$ 18                    |
| <i>Lodderomyces elongisporus</i> | A7     | 117 $\pm$ 12      | 200 $\pm$ 13    | nd                              |
| <i>Pichia fermentans</i>         | A18    | 108 $\pm$ 15      | 203 $\pm$ 21    | nd                              |
| <i>Kluyveromyces lactis</i>      | A3     | 114 $\pm$ 17      | nd              | nd                              |
| <i>Pichia kudriavzevii</i>       | A9     | 73 $\pm$ 8        | 173 $\pm$ 18    | nd                              |
| <i>Torulasporea debrueckii</i>   | A5     | 85 $\pm$ 10       | 113 $\pm$ 13    | nd                              |
| <i>Pichia kudriavzevii</i>       | A8     | 107 $\pm$ 11      | 127 $\pm$ 13    | nd                              |

<sup>nd</sup> Means not detected.

<sup>1</sup> Data are mean  $\pm$  standard deviation of three replicate analyses (n = 3).

**Table S3.** Free amino acid content of four Kazakh cheeses (g/100 g)

| <b>FAA</b> | <b>Control</b>              | <b>KmC</b>                 | <b>PkC</b>                 | <b>PfC</b>                 |
|------------|-----------------------------|----------------------------|----------------------------|----------------------------|
| Asp        | 0.225 ± 0.003 <sup>b</sup>  | 0.268 ± 0.002 <sup>a</sup> | 0.225 ± 0.001 <sup>b</sup> | 0.229 ± 0.002 <sup>b</sup> |
| Thr        | 0.132 ± 0.001 <sup>b</sup>  | 0.148 ± 0.002 <sup>a</sup> | 0.129 ± 0.001 <sup>c</sup> | 0.126 ± 0.002 <sup>d</sup> |
| Ser        | 0.157 ± 0.002 <sup>b</sup>  | 0.172 ± 0.002 <sup>a</sup> | 0.147 ± 0.002 <sup>c</sup> | 0.146 ± 0.003 <sup>c</sup> |
| Glu        | 0.514 ± 0.003 <sup>c</sup>  | 0.627 ± 0.004 <sup>a</sup> | 0.503 ± 0.003 <sup>d</sup> | 0.560 ± 0.004 <sup>b</sup> |
| Gly        | 0.066 ± 0.001 <sup>c</sup>  | 0.077 ± 0.001 <sup>a</sup> | 0.068 ± 0.003 <sup>b</sup> | 0.064 ± 0.002 <sup>c</sup> |
| Ala        | 0.115 ± 0.001 <sup>bc</sup> | 0.132 ± 0.001 <sup>a</sup> | 0.117 ± 0.002 <sup>b</sup> | 0.113 ± 0.001 <sup>c</sup> |
| Cys        | 0.002 ± 0.001 <sup>a</sup>  | 0.003 ± 0.001 <sup>a</sup> | 0.003 ± 0.001 <sup>a</sup> | 0.002 ± 0.001 <sup>a</sup> |
| Val        | 0.217 ± 0.003 <sup>b</sup>  | 0.204 ± 0.002 <sup>c</sup> | 0.228 ± 0.002 <sup>a</sup> | 0.207 ± 0.001 <sup>c</sup> |
| Met        | 0.086 ± 0.001 <sup>b</sup>  | 0.096 ± 0.002 <sup>a</sup> | 0.085 ± 0.001 <sup>b</sup> | 0.082 ± 0.002 <sup>c</sup> |
| Ile        | 0.187 ± 0.002 <sup>c</sup>  | 0.211 ± 0.003 <sup>a</sup> | 0.197 ± 0.001 <sup>b</sup> | 0.181 ± 0.002 <sup>d</sup> |
| Leu        | 0.017 ± 0.002 <sup>a</sup>  | 0.016 ± 0.001 <sup>a</sup> | 0.018 ± 0.003 <sup>a</sup> | 0.012 ± 0.002 <sup>b</sup> |
| Tyr        | 0.180 ± 0.002 <sup>b</sup>  | 0.190 ± 0.002 <sup>a</sup> | 0.161 ± 0.001 <sup>c</sup> | 0.153 ± 0.003 <sup>d</sup> |
| Phe        | 0.164 ± 0.002 <sup>c</sup>  | 0.187 ± 0.003 <sup>a</sup> | 0.175 ± 0.002 <sup>b</sup> | 0.159 ± 0.002 <sup>d</sup> |
| Lys        | 0.261 ± 0.001 <sup>c</sup>  | 0.291 ± 0.002 <sup>a</sup> | 0.269 ± 0.002 <sup>b</sup> | 0.225 ± 0.003 <sup>d</sup> |
| His        | 0.091 ± 0.001 <sup>c</sup>  | 0.103 ± 0.001 <sup>a</sup> | 0.095 ± 0.002 <sup>b</sup> | 0.088 ± 0.002 <sup>d</sup> |
| Arg        | 0.120 ± 0.002 <sup>b</sup>  | 0.131 ± 0.002 <sup>a</sup> | 0.118 ± 0.001 <sup>b</sup> | 0.111 ± 0.002 <sup>c</sup> |
| Pro        | 0.250 ± 0.001 <sup>c</sup>  | 0.278 ± 0.003 <sup>a</sup> | 0.259 ± 0.002 <sup>b</sup> | 0.238 ± 0.003 <sup>d</sup> |
| Total      | 2.784 ± 0.032 <sup>b</sup>  | 3.134 ± 0.025 <sup>a</sup> | 2.797 ± 0.027 <sup>b</sup> | 2.696 ± 0.034 <sup>c</sup> |

<sup>1</sup> Data are mean ± standard deviation of three replicate analyses (n = 3).

<sup>a-d</sup> Means with different superscripts within the same row are significantly (P < 0.05) different.

**Table S4.** Organic acid content of four Kazakh cheeses (g/kg)

| Organic acids | Control                     | KmC                         | PkC                         | PfC                         |
|---------------|-----------------------------|-----------------------------|-----------------------------|-----------------------------|
| Lactic acid   | 17.910 ± 1.210 <sup>b</sup> | 38.770 ± 3.420 <sup>a</sup> | 17.150 ± 1.270 <sup>b</sup> | 15.380 ± 1.360 <sup>b</sup> |
| Malic acid    | 1.710 ± 0.709 <sup>b</sup>  | 3.310 ± 0.615 <sup>a</sup>  | 3.110 ± 0.526 <sup>a</sup>  | 2.980 ± 0.721 <sup>a</sup>  |
| Citric acid   | 3.631 ± 0.385 <sup>a</sup>  | 3.803 ± 0.853 <sup>a</sup>  | 3.527 ± 0.174 <sup>a</sup>  | 3.762 ± 0.203 <sup>a</sup>  |
| Tartaric acid | 4.864 ± 0.813 <sup>b</sup>  | 5.318 ± 0.974 <sup>b</sup>  | 9.492 ± 1.023 <sup>a</sup>  | 9.241 ± 1.022 <sup>a</sup>  |
| Succinic acid | 3.700 ± 0.624 <sup>b</sup>  | 8.340 ± 1.533 <sup>a</sup>  | 3.070 ± 0.617 <sup>b</sup>  | 3.350 ± 1.014 <sup>b</sup>  |
| Total         | 31.815 ± 3.741 <sup>b</sup> | 59.541 ± 7.395 <sup>a</sup> | 36.349 ± 3.610 <sup>b</sup> | 34.713 ± 4.320 <sup>b</sup> |

a Data are mean ± standard deviation of three replicate analyses (n = 3).

<sup>a-d</sup> Means with different superscripts within the same row are significantly (P < 0.05) different.

**Table S5.** Texture analysis of cheeses

| Texture            | Control                    | KmC                        | PkC                        | PfC                        |
|--------------------|----------------------------|----------------------------|----------------------------|----------------------------|
| Hardness (N)       | 2.820 ± 0.150 <sup>a</sup> | 2.446 ± 0.120 <sup>b</sup> | 1.657 ± 0.110 <sup>c</sup> | 1.851 ± 0.130 <sup>c</sup> |
| Springiness        | 0.755 ± 0.026 <sup>a</sup> | 0.616 ± 0.024 <sup>b</sup> | 0.605 ± 0.022 <sup>b</sup> | 0.573 ± 0.021 <sup>b</sup> |
| Cohesiveness       | 0.514 ± 0.014 <sup>a</sup> | 0.452 ± 0.012 <sup>b</sup> | 0.510 ± 0.011 <sup>a</sup> | 0.501 ± 0.010 <sup>a</sup> |
| Chewiness (N)      | 1.450 ± 0.094 <sup>a</sup> | 1.115 ± 0.087 <sup>b</sup> | 0.846 ± 0.072 <sup>c</sup> | 0.927 ± 0.081 <sup>c</sup> |
| Gumminess (N)      | 1.094 ± 0.084 <sup>a</sup> | 0.687 ± 0.034 <sup>b</sup> | 0.512 ± 0.023 <sup>c</sup> | 0.531 ± 0.027 <sup>c</sup> |
| Chewing resilience | 0.253 ± 0.014 <sup>a</sup> | 0.197 ± 0.012 <sup>b</sup> | 0.207 ± 0.015 <sup>b</sup> | 0.204 ± 0.017 <sup>b</sup> |

<sup>1</sup> Data are mean ± standard deviation of three replicate analyses (n = 3).

<sup>a-d</sup> Means with different superscripts within the same row are significantly (P < 0.05) different.

**Table S6.** Odor description and odor activity value (OAV) of aroma compounds in Kazak cheese.

| <b>Compound</b> | <b>Odor description</b>     | <b>Odor threshold<sup>a</sup><br/>(<math>\mu\text{g/L}</math>)</b> | <b>OAV in<br/>Control</b> | <b>OAV in<br/>KmC</b> | <b>OAV in<br/>PkC</b> | <b>OAV in<br/>Pfc</b> |
|-----------------|-----------------------------|--------------------------------------------------------------------|---------------------------|-----------------------|-----------------------|-----------------------|
| 1-Hexanol       | Herbaceous, fruity          | 5.6                                                                | nd                        | 2.57                  | 3.74                  | 1.07                  |
| 2,3-Butanediol  | Fruity, onion               | 95.1                                                               | 3.4                       | 42.81                 | 4.38                  | 1.23                  |
| Hexanal         | Herbaceous                  | 10                                                                 | nd                        | 3.67                  | 3.03                  | nd                    |
| Nonanal         | Citrus-like, oily, rose     | 8                                                                  | nd                        | 7.34                  | 1.91                  | 1.74                  |
| Ethyl acetate   | Fruity, orange              | 5                                                                  | 124.02                    | 98.79                 | 138.18                | 53.45                 |
| Ethyl butanoate | Fruity, apple               | 18                                                                 | nd                        | 9.92                  | 1.70                  | nd                    |
| Isoamyl acetate | Fruity, banana              | 30                                                                 | 19.04                     | 1.22                  | 19.11                 | 64.37                 |
| Ethyl hexanoate | Brandy, orange, sour, fatty | 5                                                                  | 7.17                      | 4.71                  | 14.79                 | 3.00                  |
| 2-Nonanone      | Fruity, flower, herbaceous  | 41                                                                 | nd                        | 1.34                  | nd                    | nd                    |

<sup>1</sup> OAV: odor activity values.

<sup>nd</sup> Means not detected.

<sup>3</sup> The letter indicates odor threshold in water from reference (Gemert, 2011) <sup>a</sup>.

Supplementary figures

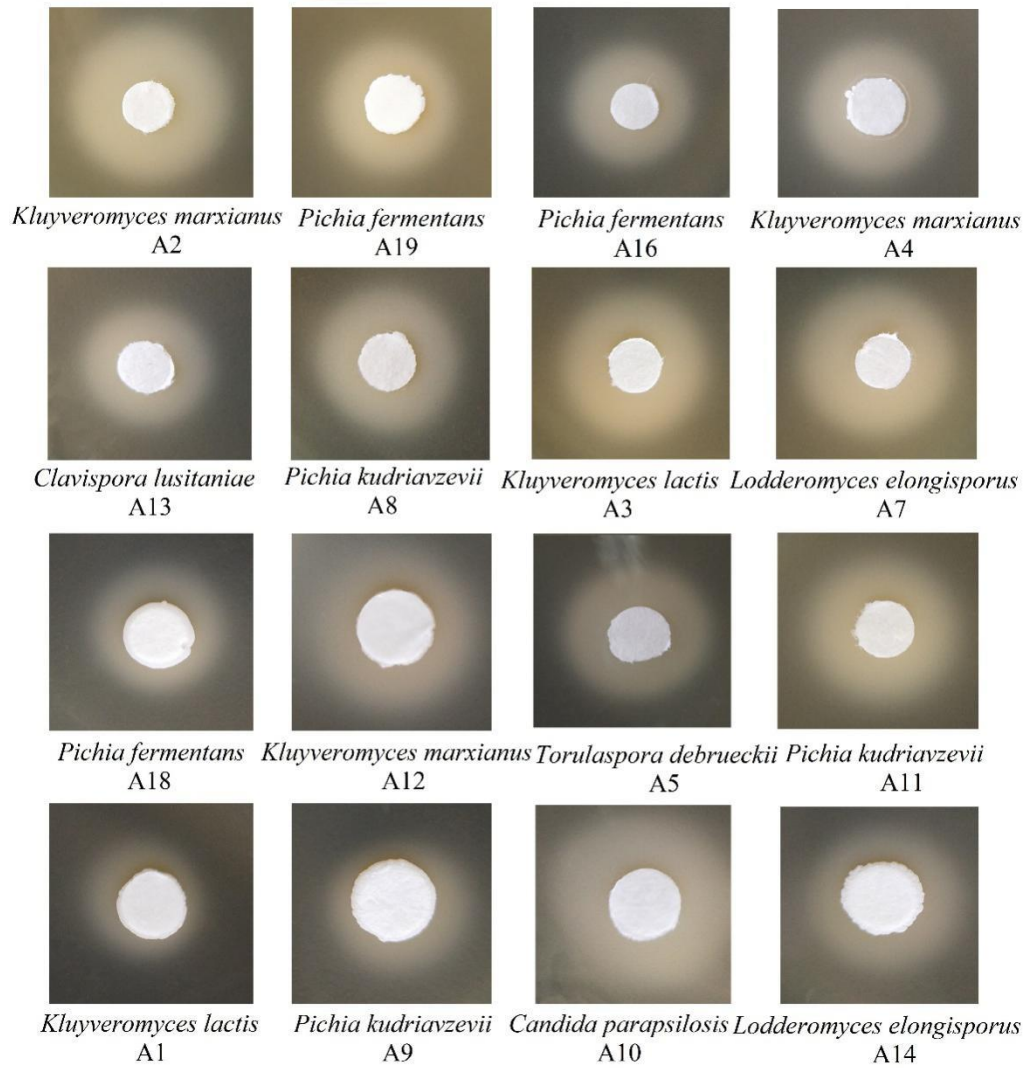

**Figure S1A.** Protease hydrolysis diagram of yeasts

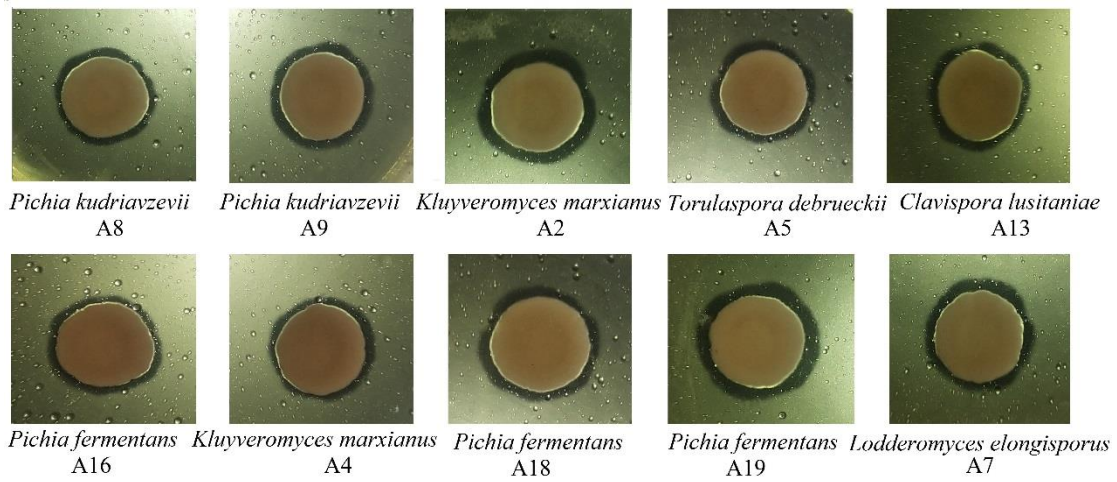

**Figure S1B.** Lipase hydrolysis diagram of yeasts

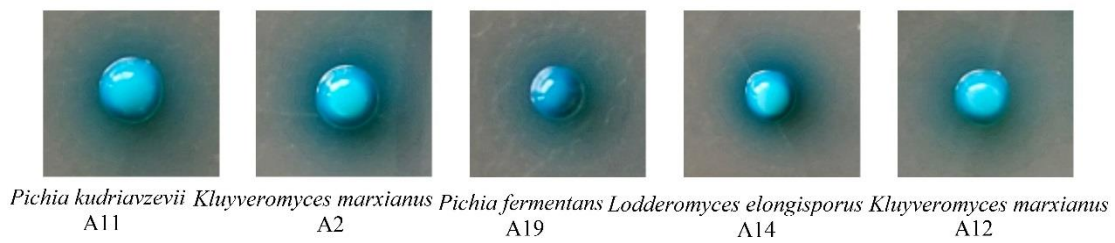

**Figure S1C.**  $\beta$ -galactosidase hydrolysis diagram of yeasts



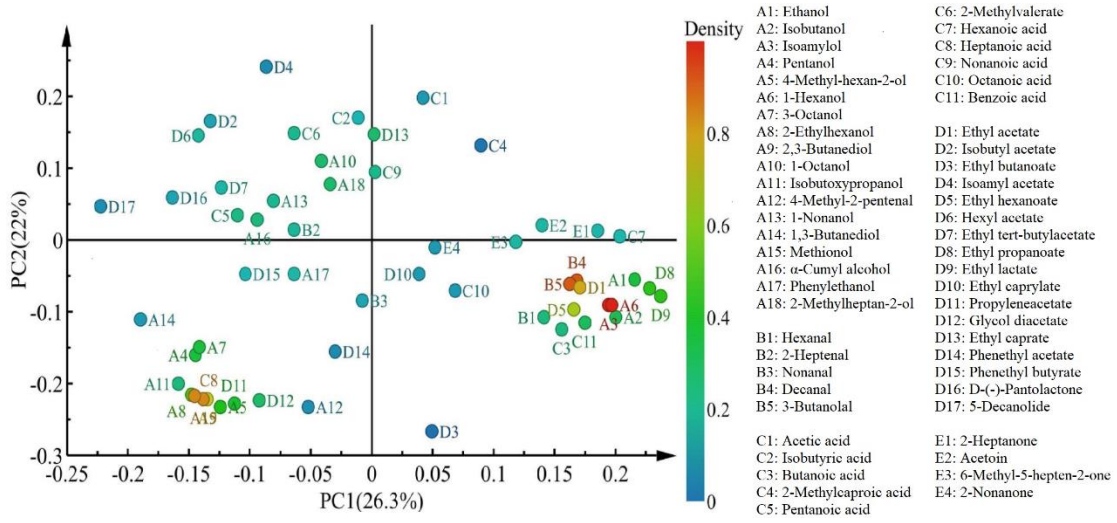

**Figure S2.** PCA analysis of volatile compounds in four Kazakh cheese.

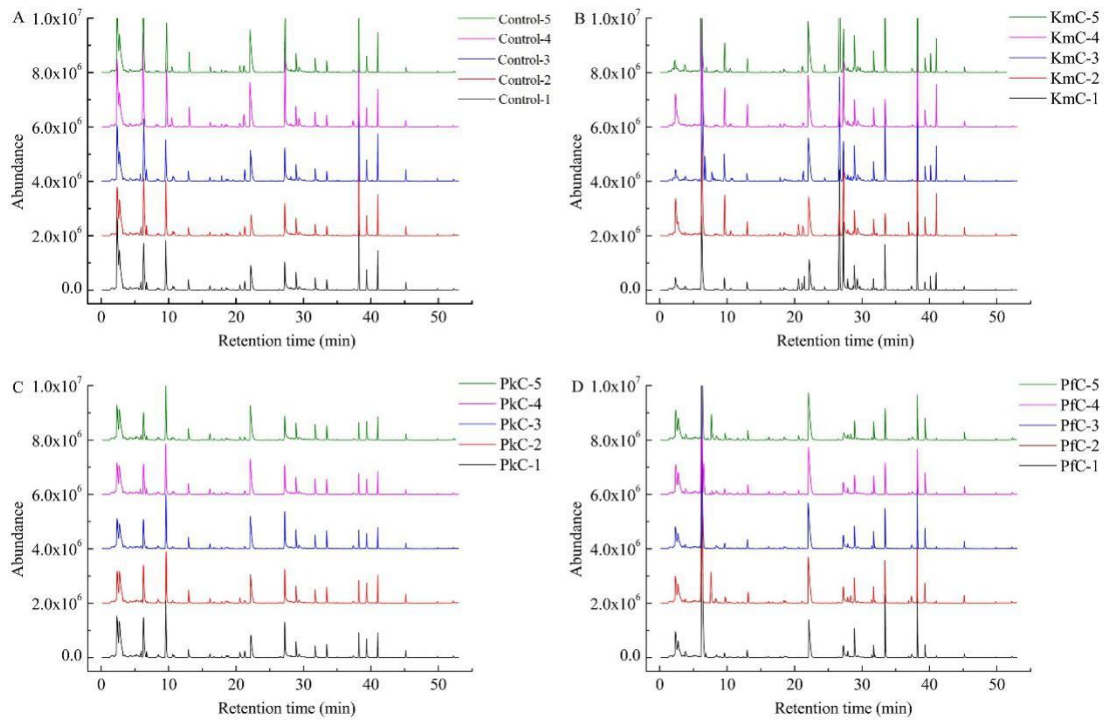

**Figure S3.** Volatile flavor map of four cheeses
